# Supplementary material for: Insights into atomic level defect commanding coupling with n–π* excitation in carbon nitride for enhanced photocatalytic hydrogen production and CO2 reduction
Source: Royal Society of Chemistry journal article supplement (doi:10.1039/d4qi02990a), 2025-01-01
Supplement: d4qi02990a1.pdf [file d4qi02990a1.pdf]

# Insights into Atomic Level Defect Commanding coupling with $n-\pi^*$ Excitation in Carbon Nitride for enhanced photocatalytic Hydrogen Production and CO<sub>2</sub> reduction

Shukui Shi<sup>a</sup>, Huibin Zong<sup>b</sup>, Zhimin Yuan<sup>c,\*</sup>, Zaiyong Jiang<sup>c</sup>, Haotian Qi<sup>d</sup>, Zhao Mo<sup>b</sup>, Xianglin Zhu<sup>b,\*</sup>

<sup>a</sup> Engineering Technology Research Center of Henan Province for Solar Catalysis, College of Chemistry and Pharmaceutical Engineering, Nanyang Normal University, Nanyang, Henan, 473061, P. R. China

<sup>b</sup> Institute for Energy Research, Jiangsu University, Zhenjiang, Jiangsu 212013, P. R. China

<sup>c</sup> School of Chemistry & Chemical Engineering and Environmental Engineering, Weifang University, Weifang, 261061, P. R. China

<sup>d</sup> College of Electrical, Energy and Power Engineering, Yangzhou University, Yangzhou, Jiangsu 225127, P. R. China

\*Corresponding author

E-mail: yuanzhiminjinan@163.com (Z. Yuan); zhuxl@ujs.edu.cn (X. Zhu)

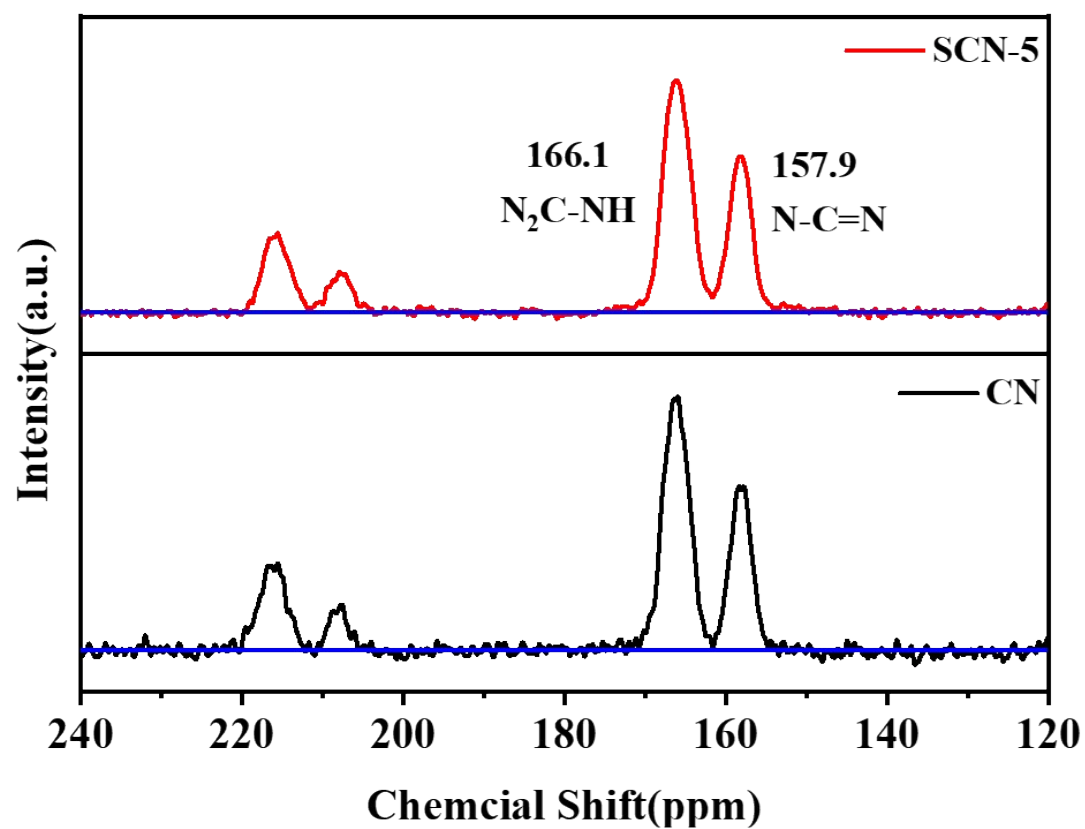

Figure S1.  $^{13}\text{C}$  solid-state NMR spectra of CN and SCN samples.

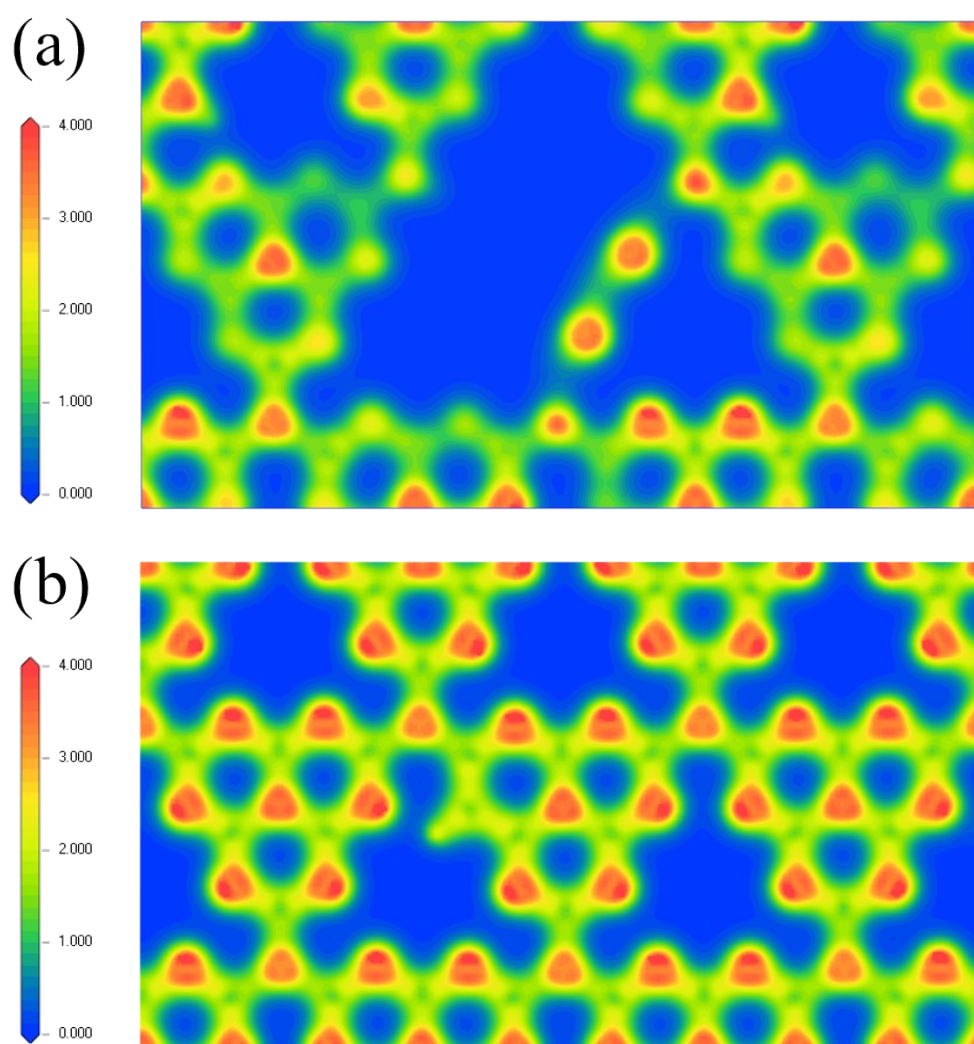

Figure S2. The electron densities of the (a) CN and (b) SCN.

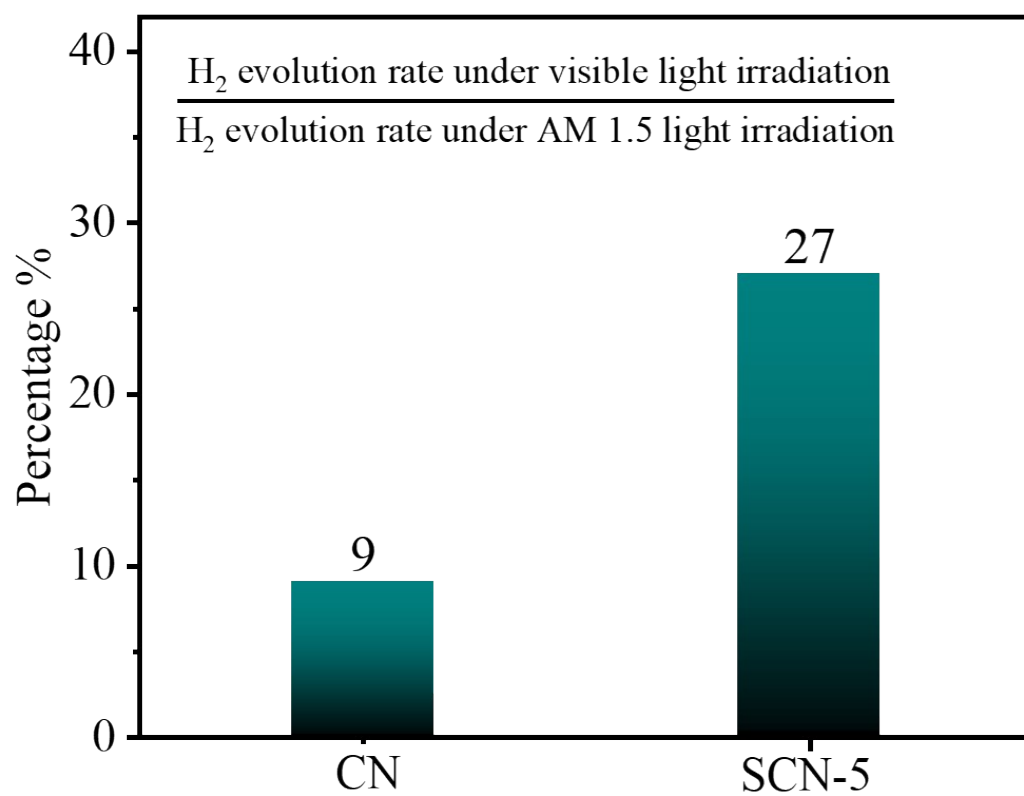

Figure S3. The contribution of visible light in photocatalytic H<sub>2</sub> production reactions.

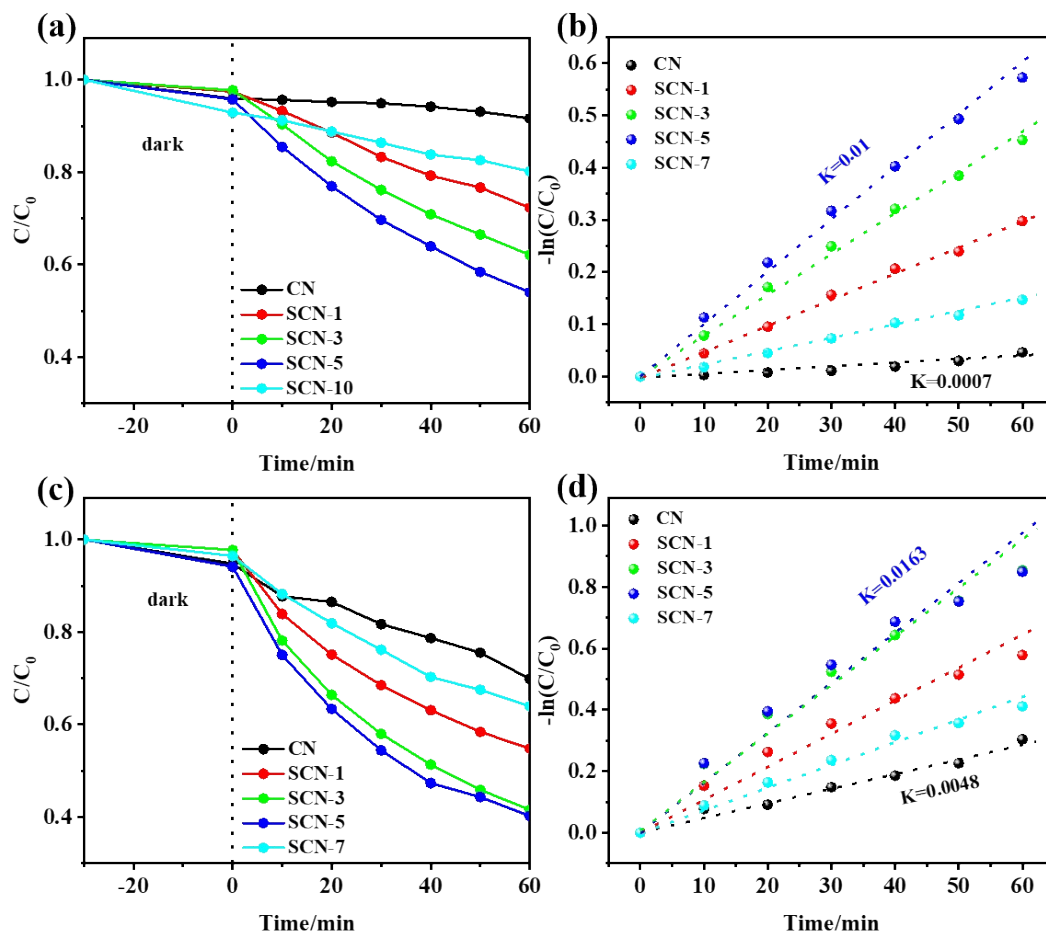

Figure S4. The degradation of tetracycline hydrochloride under visible light irradiation and the degradation kinetics of (a, b) photocatalytic degradation and (c, d) persulfate activation experiment.

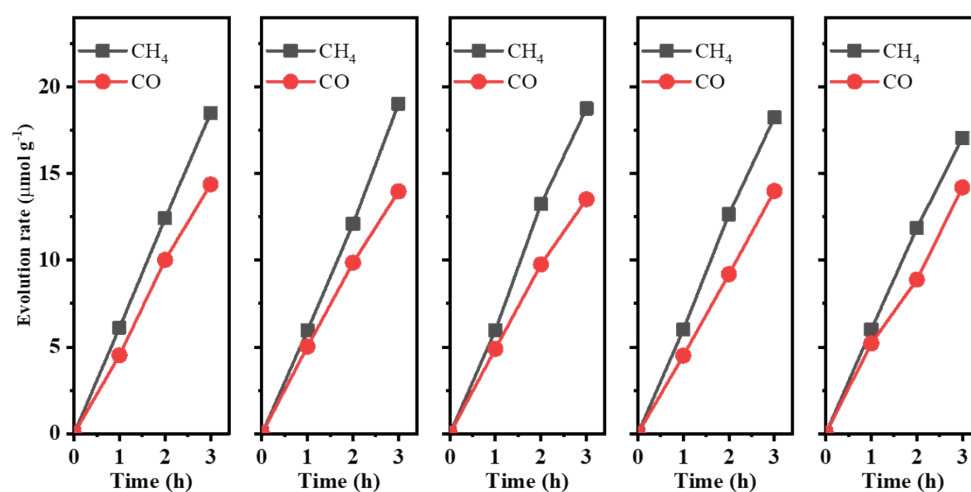

Figure S5. Stability test of photocatalytic  $CO_2$  reduction.

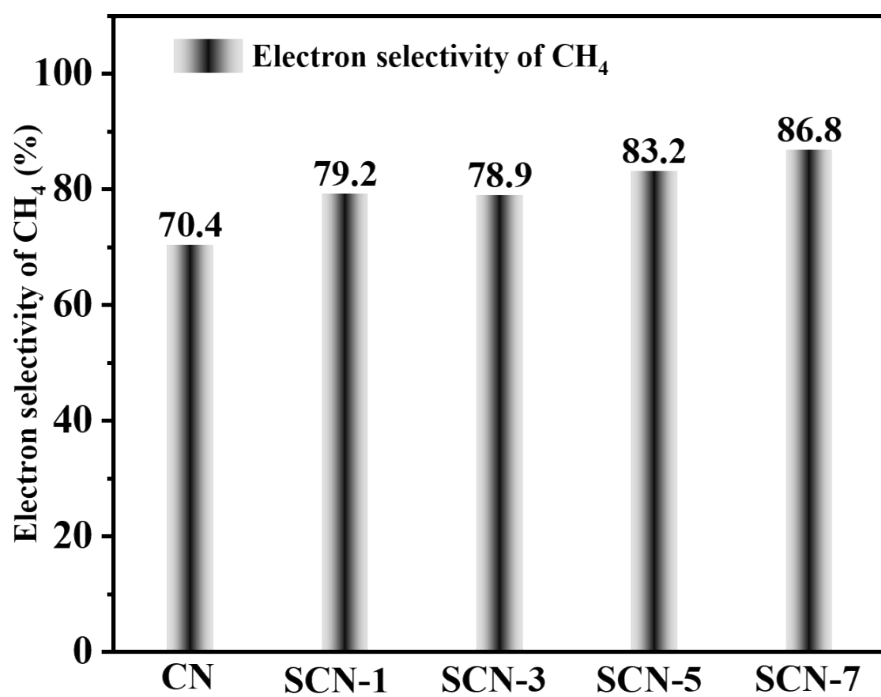

Figure S6. The CH<sub>4</sub> electron selectivity of the different samples.

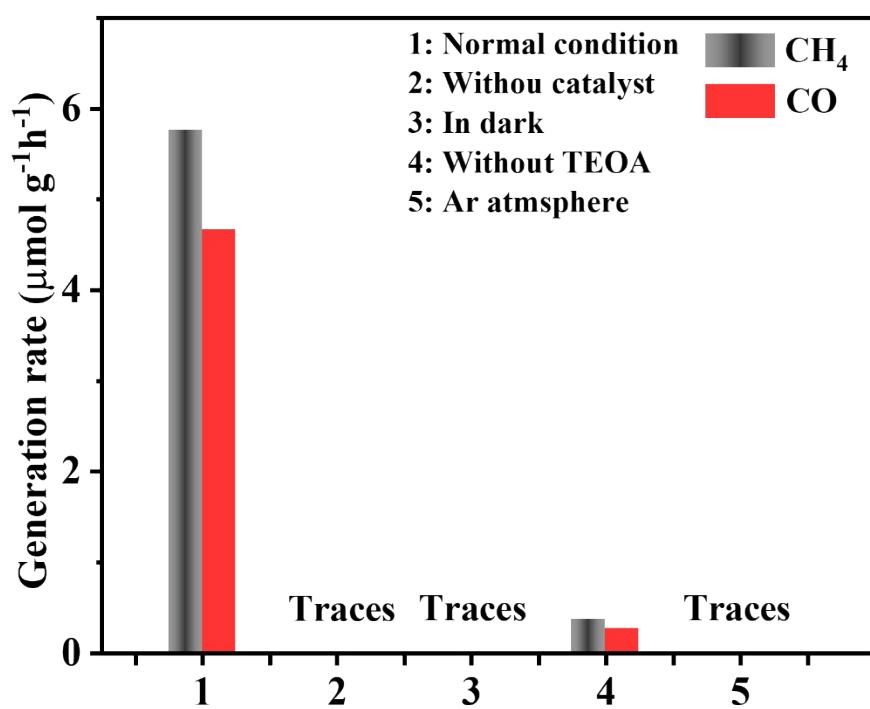

Figure S7. The comparative experiments of photocatalytic CO<sub>2</sub> reduction.

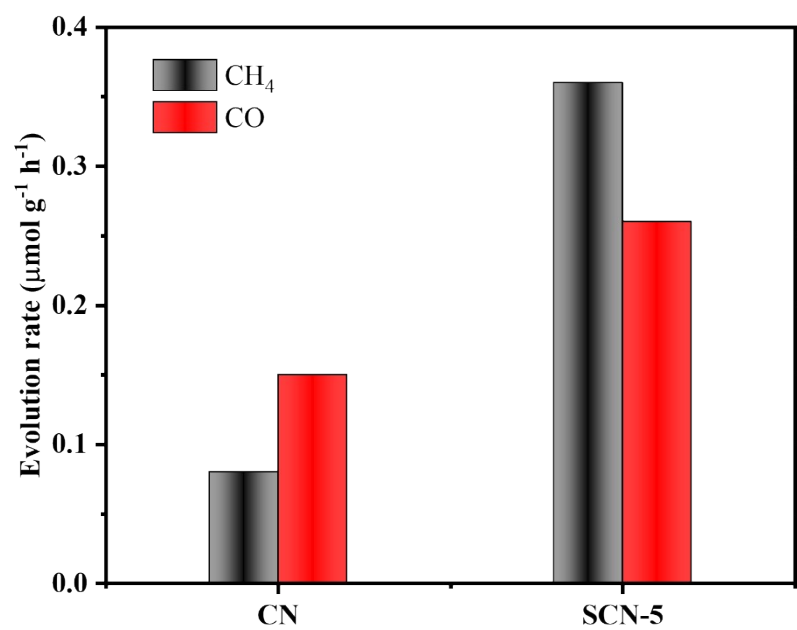

Figure S8. The photocatalytic CO<sub>2</sub> reduction performance in the absence of TEOA.
